# Supplementary material for: Improved kinetics of the Mg(NH2)2–2LiH system by addition of lithium halides
Source: Royal Society of Chemistry journal article supplement (doi:10.1039/c4ra02864c), 2014-07-17
Supplement: c4ra02864c1.pdf [file c4ra02864c1.pdf]

## Improved kinetics of $\text{Mg}(\text{NH}_2)_2\text{-}2\text{LiH}$ system by addition of lithium halides

Hujun Cao<sup>ab</sup>, Han Wang<sup>b</sup>, Teng He<sup>b\*</sup>, Guotao Wu<sup>b</sup>, Zhitao Xiong<sup>b</sup>,  
Jieshan Qiu<sup>a</sup>, Ping Chen<sup>bc\*</sup>

<sup>a</sup> Carbon Research Laboratory, Liaoning Key Lab for Energy Materials and Chemical Engineering, State Key Lab of Fine Chemicals, Dalian University of Technology, Dalian 116024, P. R. China.

<sup>b</sup> Dalian National Laboratory for Clean Energy, Dalian Institute of Chemical Physics, Chinese Academy of Sciences, Dalian 116023, P. R. China.

<sup>c</sup> State Key Laboratory of Catalysis, Dalian Institute of Chemical Physics, Chinese Academy of Sciences, Dalian 116023, P. R. China.

\* E-mail: [heteng@dicp.ac.cn](mailto:heteng@dicp.ac.cn), Tel: +86-411-84379583, Fax: +86-411-84379583

\* E-mail: [pchen@dicp.ac.cn](mailto:pchen@dicp.ac.cn), Tel: +86-411-84379905, Fax: +86-411-84379583

### Supporting information

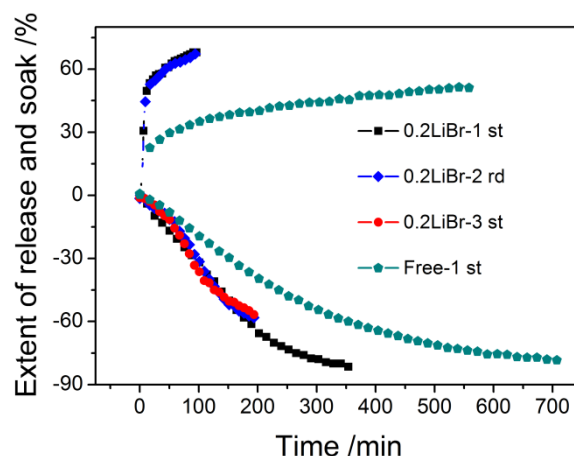

Fig S1. 3 times of isothermal hydrogen desorption and 2 times of isothermal hydrogen absorption of 0.2 LiBr-doped sample at 140 °C. (The dehydrogenation/rehydrogenation rates of 0.2LiBr-doped sample at 140 °C can be hardly reduced).

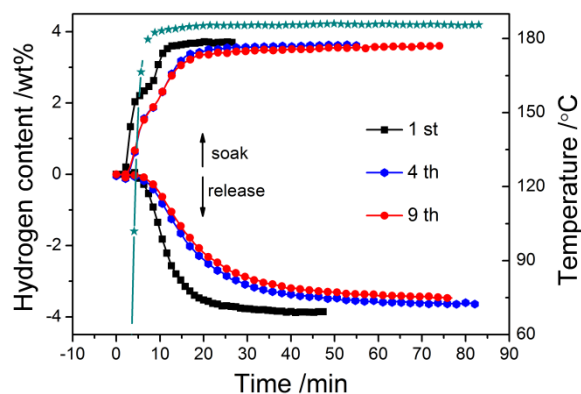

Fig S2. The first, fourth and ninth isothermal hydrogen desorption/absorption cycles of 0.2LiBr-doped sample. (The ninth cycle remains the same hydrogen storage properties as the fourth one).

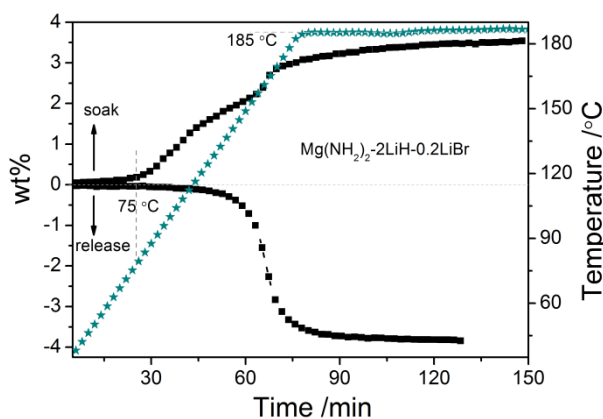

Fig S3. Temperature programmed volumetric release and subsequent soak measurements on the 0.2LiBr-doped sample of the first cycle. (The onset temperature of 0.2LiBr-doped sample is 75 °C, which is about 20 °C lower than that of the  $\text{Li}_2\text{Mg}(\text{NH})_2$  sample. Reference: *Advanced Materials* 2004, **16**, 1522).

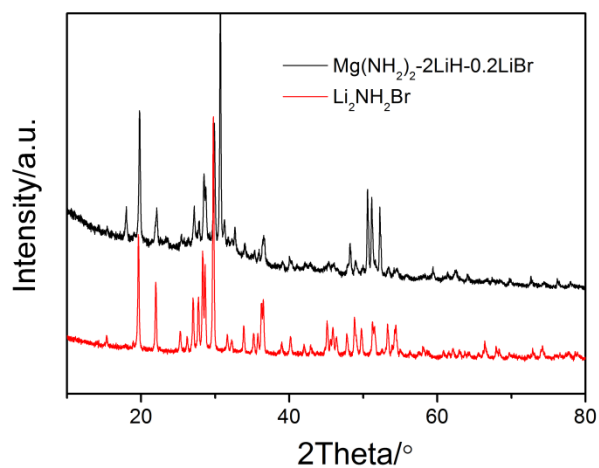

Fig S4. XRD pattern of 0.2LiBr-doped sample after quenching at 200 °C for 18 h and the as-prepared Li<sub>2</sub>NH<sub>2</sub>Br samples. (Li<sub>2</sub>NH<sub>2</sub>Br was prepared according to *Faraday Discuss*, 2011, **151**, 271).

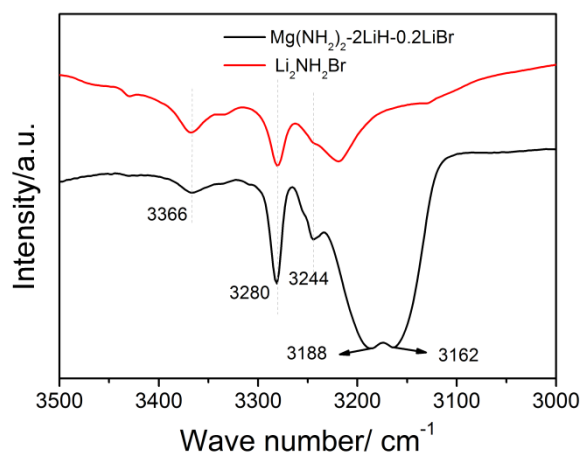

Fig S5. FTIR spectra of 0.2LiBr-doped sample after quenching at 200 °C for 18 h and the as-prepared Li<sub>2</sub>NH<sub>2</sub>Br sample.

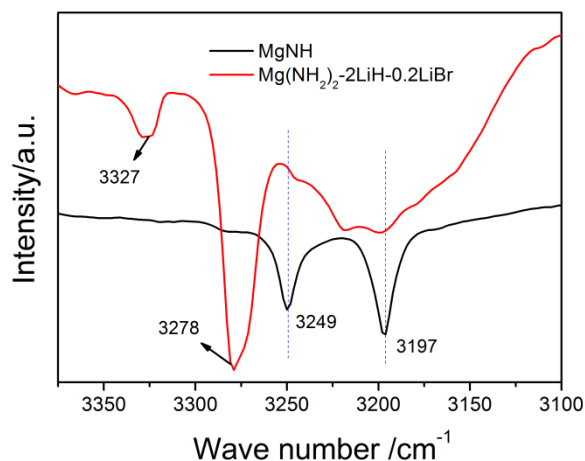

Fig S6. FTIR spectra of 0.2LiBr-doped sample after hydrogenation at 185 °C and the pure MgNH sample.

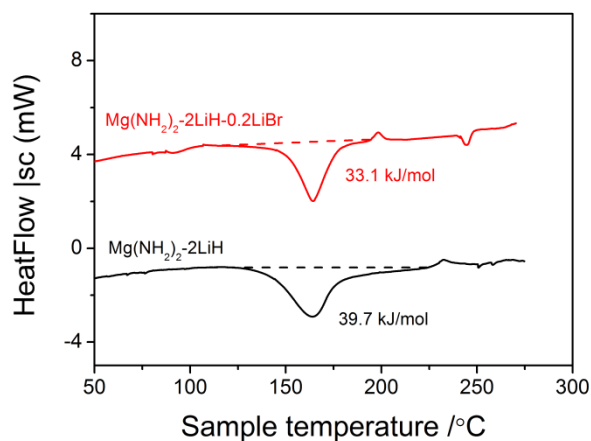

Fig S7. The C80 information of 0.2LiBr-doped and pristine  $\text{Mg}(\text{NH}_2)_2\text{-}2\text{LiH}$  samples. (Differential scanning calorimetry (DSC) measurement was carried out on a SETARAM C80 thermal analysis system equipped with a closed sample cell at a ramping rate of 0.2 K/min. With the C80 result, we can see that the dehydrogenation enthalpy of  $\text{Mg}(\text{NH}_2)_2\text{-}2\text{LiH}$  system was reduced from 39.7 to 33.1 kJ/mol  $\text{H}_2$  by addition of 0.2LiBr).
